# Supplementary material for: The Potential of Condiments, Seasonings, and Bouillon Cubes to Deliver Essential Micronutrients in Asia: Scenario Analyses of Iodine and Iron Fortification
Source: MDPI journal article supplement (doi:10.3390/nu15030616), 2023-01-25
Supplement: s1 [file s1]

## Supplementary materials

Table S1. Overview of included studies

| Reference               | Year | Country   | Region                                          | Characteristic Study                                                            | Age Group           | Gender             | Sample Size    | Methodology                                                                                                                             | Food Group                                          |
|-------------------------|------|-----------|-------------------------------------------------|---------------------------------------------------------------------------------|---------------------|--------------------|----------------|-----------------------------------------------------------------------------------------------------------------------------------------|-----------------------------------------------------|
| <b>Andarwulan [1]</b>   | 2011 | Indonesia | Jakarta (urban)                                 | Cross-sectional study                                                           | All                 | M+F                | 222 households | Questionnaire on condiments and seasoning usage                                                                                         | Soy sauce                                           |
|                         |      | Indonesia | Bogor (rural)                                   | Cross-sectional study                                                           | All                 | M+F                | 222 households | Questionnaire on condiments and seasoning usage                                                                                         | Soy sauce                                           |
| <b>Choi [2,3]</b>       | 2020 | Korea     | Seoul, Chungcheong-do, Gyeongsang-do, Jeolla-do | Evaluation of nutrient intake of Mn with use of dietary intake survey           | Adults              | M+F                | 640            | 24-h recall, executed together with dietitian                                                                                           | Soy sauce, seasoning                                |
| <b>Chotivichien [4]</b> | 2021 | Thailand  | National data                                   | Data modelling based on consumption data and food labelling/laboratory analysis | Non-pregnant adults | M+F (non-pregnant) | NR             | National sodium chloride intake survey and market share reports                                                                         | Seasoning powder, soy sauce, fish sauce             |
| <b>Choy [5]</b>         | 2021 | Singapore | Nationwide                                      | Cross-sectional                                                                 | 6-12                | M+F                | 561            | 24-h recall, 2 times (one weekend and one weekday)                                                                                      | Bouillon cubes/flavourings, essence, yeast extracts |
| <b>Do [6]</b>           | 2014 | Vietnam   | Rural                                           | Survey on sodium intake                                                         | Adults              | M+F                | 121            | 24hr direct weighing                                                                                                                    | Seasoning, fish sauce                               |
| <b>Fang [7]</b>         | 2020 | China     | Nationwide                                      | China National Nutrition and Health Surveillance CNNHS 2010-2012                | Adults              | M+F                | 53993          | 24-h recall, 3 times, combined with household weighing method. Done by dietary trained staff. Sodium intake calculated with Chinese FCT | Soy sauce                                           |

|                                              |      |             |                                 |                                                                                    |               |     |                 |                                                                                                 |                                          |
|----------------------------------------------|------|-------------|---------------------------------|------------------------------------------------------------------------------------|---------------|-----|-----------------|-------------------------------------------------------------------------------------------------|------------------------------------------|
| <b>Knowles [8]</b>                           | 2017 | Indonesia   | Nationwide                      | Data modelling based on market data                                                | -             | -   | -               | GAIN analysed data from Euromonitor passport 2013 and PT Neilson company                        | Soy sauce, stock (including seasoning)   |
|                                              |      | Philippines | Nationwide                      | Data modelling based on market data                                                | -             | -   | -               | 2008 National Nutrition Survey (NNS) chapter on household food consumption                      | Soy sauce                                |
| <b>Lauillou [9]</b>                          | 2012 | Vietnam     | national                        | Food consumption survey                                                            | 19-50y        | F   | 7680 households | 24h recall with controlled food weighing                                                        | Soy sauce, fish sauce, flavouring powder |
| <b>Lee [10]</b>                              | 2005 | Philippines | Metropolitan Cebu               | Cebu Longitudinal Health and Nutrition Survey - cohort                             | Adults        | F   | 1776            | Two 24-hour dietary recalls + semi structured questionnaire                                     | Soy sauce, fish sauce                    |
| <b>Malaysia [11]</b>                         | 2014 | Malaysia    | National                        | Malaysian Adult Nutrition Survey (MANS)                                            | Adults 18-59y | M+F | NR              | 24h recall and FFQ                                                                              | Soy sauce                                |
| <b>Philippines national intake data [12]</b> | 2015 | Philippines | National                        | Dietary survey                                                                     | All           | M+F | 9930 households | Food weighing, food inventory, food recall                                                      | Soy sauce,                               |
| <b>Theary [13]</b>                           | 2012 | Cambodia    | National                        | Cross-sectional survey                                                             | Adults        | M+F | 2797 households | Questionnaire on knowledge and utilization of soy and fish sauce                                | Soy sauce, fish sauce                    |
| <b>Whitfield [14]</b>                        | 2016 | Cambodia    | PreyVeng Province (rural areas) | Community-based, double-blind, 3 parallel-arm randomized controlled efficacy trial | Adults        | M+F | 276             | 3-day weigh fish sauce record                                                                   | Fish sauce                               |
| <b>Yu [15]</b>                               | 2018 | China       | Nationwide                      | China health and nutrition survey                                                  | Adults        | M+F | 15510           | Daily record                                                                                    | Soy sauce                                |
| <b>Yu [16]</b>                               | 2011 | China       | National                        | China health and nutrition survey                                                  | Adults        | M+F | 12.344          | Soy sauce consumption was determined on a daily basis by calculating changes in home food stock | Soy sauce                                |
| <b>Zhai [17]</b>                             | 2005 | China       | 132 counties in 31 provinces    | Cross-sectional survey                                                             | Adults        | M+F | 68.962          | 24 h recall on 3 consecutive days and condiments data collected with weighing method            | Soy sauce                                |

|                 |      |       |          |                      |       |     |      |                                                                               |           |
|-----------------|------|-------|----------|----------------------|-------|-----|------|-------------------------------------------------------------------------------|-----------|
| <b>Zhu [18]</b> | 2019 | China | Shanghai | Observational cohort | >15 y | M+F | 1704 | 3-d 24-h recall + household weighing. Chinese Database used to define groups. | Soy sauce |
|-----------------|------|-------|----------|----------------------|-------|-----|------|-------------------------------------------------------------------------------|-----------|

Table S2. Iodine intake following fortification with different iodine levels in iodized salt for soy and fish sauces.

| Country             | Type of Condiment | Mean Intake of Condiment (g/d) | Assumed Salt Content of Condiment (%) | Mean Salt Intake from Condiment g/d) | Mean Iodine Intake following Fortification with Iodized Salt at Different Levels |        |        |        |        |        |
|---------------------|-------------------|--------------------------------|---------------------------------------|--------------------------------------|----------------------------------------------------------------------------------|--------|--------|--------|--------|--------|
|                     |                   |                                |                                       |                                      | 18 ppm                                                                           |        | 30 ppm |        | 70 ppm |        |
|                     |                   |                                |                                       |                                      | µg/d                                                                             | %NRV * | µg/d   | %NRV * | µg/d   | %NRV * |
| Indonesia [1,8]     | soy sauce         | 9.1                            | 14                                    | 1.3                                  | 23                                                                               | 15     | 38     | 25     | 89     | 59     |
| Korea [2]           | soy sauce         | 6.0                            | 14                                    | 0.8                                  | 15                                                                               | 10     | 25     | 17     | 59     | 39     |
| China [7,15–18]     | soy sauce         | 6.8                            | 14                                    | 0.9                                  | 17                                                                               | 11     | 28     | 19     | 66     | 44     |
| Philippines [10,12] | soy sauce         | 3.2                            | 14                                    | 0.4                                  | 8                                                                                | 5      | 13     | 9      | 31     | 21     |
| Malaysia [11]       | soy sauce         | 7.7                            | 14                                    | 1.1                                  | 19                                                                               | 13     | 32     | 22     | 75     | 50     |
| Cambodia [13]       | soy sauce         | 10.2                           | 14                                    | 1.4                                  | 26                                                                               | 17     | 43     | 29     | 100    | 67     |
| Cambodia [13,14]    | fish sauce        | 13.1                           | 25                                    | 3.3                                  | 59                                                                               | 39     | 98     | 66     | 229    | 153    |
| Vietnam [6]         | fish sauce        | 15.9                           | 25                                    | 4.0                                  | 27                                                                               | 18     | 119    | 80     | 104    | 69     |
| Vietnam [9]         | fish+soy sauce    | 10.6                           | 20                                    | 2.1                                  | 72                                                                               | 48     | 64     | 42     | 278    | 186    |
| Thailand [4]        | fish+soy sauce    | 7.4                            | 20                                    | 1.5                                  | 38                                                                               | 25     | 44     | 30     | 148    | 99     |

\* NRV = Codex nutrient reference value, 150 µg/d for iodine

Table S3. Iodine intake following fortification with different iodine levels in iodized salt for seasonings and bouillon cubes.

| Country        | Type of Cooking Aid                                 | Mean Intake of Cooking Aid (g/d) | Assumed Salt Content of Cooking Aid (%) | Mean Salt Intake from Cooking Aid (g/d) | Mean Iodine Intake following Fortification with Iodized Salt at Different Levels |        |        |        |        |        |
|----------------|-----------------------------------------------------|----------------------------------|-----------------------------------------|-----------------------------------------|----------------------------------------------------------------------------------|--------|--------|--------|--------|--------|
|                |                                                     |                                  |                                         |                                         | 18 ppm                                                                           |        | 30 ppm |        | 70 ppm |        |
|                |                                                     |                                  |                                         |                                         | µg/d                                                                             | %NRV * | µg/d   | %NRV * | µg/d   | %NRV * |
| Korea [3]      | seasoning                                           | 0.4                              | 50                                      | 0.2                                     | 3                                                                                | 2      | 5      | 4      | 13     | 8      |
| Thailand [4]   | seasoning powder                                    | 1.3                              | 50                                      | 0.7                                     | 12                                                                               | 8      | 20     | 13     | 46     | 30     |
| Singapore [5]  | bouillon cubes/flavourings, essence, yeast extracts | 0.4                              | 50                                      | 0.2                                     | 4                                                                                | 2      | 6      | 4      | 14     | 9      |
| Indonesia [31] | seasoning/stock                                     | 1.8                              | 50                                      | 0.9                                     | 16                                                                               | 11     | 26     | 18     | 61     | 41     |
| Vietnam [6,9]  | seasoning/flavouring powder                         | 5.6                              | 50                                      | 2.8                                     | 50                                                                               | 33     | 83     | 56     | 194    | 130    |

\* NRV = Codex nutrient reference value, 150 µg/d for iodine

Table S4. Iron intake following fortification with different iron levels for soy and fish sauces.

| Country             | Type of Condiment | Mean Intake of Condiment (g/d) | Mean Iron Intake following Fortification with Different Iron Levels |        |                         |        |                       |        |
|---------------------|-------------------|--------------------------------|---------------------------------------------------------------------|--------|-------------------------|--------|-----------------------|--------|
|                     |                   |                                | 0.1 mg Iron / g Product                                             |        | 0.5 mg Iron / g Product |        | 1 mg Iron / g Product |        |
|                     |                   |                                | mg/d                                                                | %NRV * | mg/d                    | %NRV * | mg/d                  | %NRV * |
| Indonesia [1,8]     | soy sauce         | 9.1                            | 0.9                                                                 | 6      | 4.5                     | 32     | 9.1                   | 64     |
| Korea [2]           | soy sauce         | 6.0                            | 0.6                                                                 | 4      | 3.0                     | 21     | 6.0                   | 42     |
| China [7,15–18]     | soy sauce         | 6.8                            | 0.7                                                                 | 5      | 3.4                     | 24     | 6.8                   | 48     |
| Philippines [10,12] | soy sauce         | 3.2                            | 0.3                                                                 | 2      | 1.6                     | 11     | 3.2                   | 22     |
| Malaysia [11]       | soy sauce         | 7.7                            | 0.8                                                                 | 6      | 3.9                     | 28     | 7.7                   | 56     |
| Cambodia [13]       | soy sauce         | 10.2                           | 1.0                                                                 | 7      | 5.1                     | 36     | 10.2                  | 72     |
| Cambodia [13,14]    | fish sauce        | 13.1                           | 1.3                                                                 | 9      | 6.6                     | 47     | 13.1                  | 94     |
| Vietnam [6]         | fish sauce        | 15.9                           | 1.6                                                                 | 5      | 8.0                     | 57     | 15.9                  | 114    |
| Vietnam [9]         | fish+soy sauce    | 10.6                           | 1.1                                                                 | 11     | 5.3                     | 38     | 10.6                  | 76     |
| Thailand [4]        | fish+soy sauce    | 7.4                            | 0.7                                                                 | 8      | 3.7                     | 26     | 7.4                   | 52     |

\* NRV = Codex nutrient reference value, 14 mg/d for iron

Table S5. Iron intake following fortification with different iron levels for seasonings and bouillon cubes.

| Country              | Type of Cooking Aid                                 | Mean Intake of Cooking Aid (g/d) | Mean Iron Intake following Fortification with Different Iron Levels |        |                       |        |                         |        |
|----------------------|-----------------------------------------------------|----------------------------------|---------------------------------------------------------------------|--------|-----------------------|--------|-------------------------|--------|
|                      |                                                     |                                  | 0.5 mg Iron / g Product                                             |        | 1 mg Iron / g Product |        | 1.5 mg Iron / g Product |        |
|                      |                                                     |                                  | mg/d                                                                | %NRV * | mg/d                  | %NRV * | mg/d                    | %NRV * |
| <b>Korea [3]</b>     | seasoning                                           | 0.4                              | 0.2                                                                 | 1      | 0.4                   | 3      | 0.5                     | 4      |
| <b>Thailand [4]</b>  | seasoning powder                                    | 1.3                              | 0.7                                                                 | 5      | 1.3                   | 9      | 2.0                     | 14     |
| <b>Singapore [5]</b> | bouillon cubes/flavourings, essence, yeast extracts | 0.4                              | 0.2                                                                 | 1      | 0.4                   | 3      | 0.6                     | 4      |
| <b>Indonesia [8]</b> | seasoning/stock                                     | 1.8                              | 0.9                                                                 | 6      | 1.8                   | 13     | 2.6                     | 19     |
| <b>Vietnam [6,9]</b> | seasoning/flavouring powder                         | 5.6                              | 2.8                                                                 | 20     | 5.6                   | 40     | 8.3                     | 59     |

\* NRV = Codex nutrient reference value, 14 mg/d for iron

## References

1. Andarwulan, N., et al., *Free Glutamate Content of Condiment and Seasonings and Their Intake in Bogor and Jakarta, Indonesia*. Food and Nutrition Sciences, 2011. **02**(07): p. 764-769.
2. Choi, M.K. and Y.J. Bae, *Dietary Intake and Urinary Excretion of Manganese in Korean Healthy Adults*. Biological Trace Element Research, 2020. **196**(2): p. 384-392.
3. Choi, M.K., et al., *Contribution of food groups to sodium and potassium intakes by their ratio in Korean adults*. Progress in Nutrition, 2019. **21**(2): p. 285-293.
4. Chotivichien, S., et al., *Assessment of the contribution of industrially processed foods to salt and iodine intake in Thailand*. PLoS ONE, 2021. **16**(7 July).
5. Choy, M.J.Y., I. Brownlee, and A.M. Murphy, *Data-driven dietary patterns, nutrient intake and body weight status in a cross-section of singaporean children aged 6–12 years*. Nutrients, 2021. **13**(4).
6. Do, H.T.P., *Hypertension in Vietnam: prevalence, risk groups and effects of salt substitution*, in *Nutrition and Disease, Human nutrition & Health*, VLAG. 2014, Wageningen University: Wageningen. p. 160.
7. Fang, K., et al., *Dietary sodium intake and food sources among Chinese adults: Data from the CNNHS 2010–2012*. Nutrients, 2020. **12**(2).
8. Knowles, J., et al., *Iodine intake through processed food: Case studies from Egypt, Indonesia, the Philippines, the Russian federation and Ukraine, 2010–2015*. Nutrients, 2017. **9**(8).
9. Laillou, A., et al., *Improvement of the Vietnamese diet for women of reproductive age by micronutrient fortification of staples foods and condiments*. PLoS One, 2012. **7**(11): p. e50538.
10. Lee, N.R., *Estimating the effects of overweight duration, sodium intake and genetic variants on hypertension risk among Filipino women in Cebu, Philippines*. 2009, The University of North Carolina at Chapel Hill.
11. Ahmad, M.H.B. *Key Findings of Recent Food Consumption and Nutrition Surveys in ASEAN - Malaysian Adult Nutrition Survey (MANS)2014*. in *symposium on dietary intakes*. 2016. Singapore.
12. (DOST-FNRI), D.o.S.a.T.-F.a.N.R.I., *Philippine Nutrition Facts and Figures 2015: Dietary Survey*. 2016: FNRI Bldg., DOST Compound, Gen. Santos Avenue, Bicutan, Taguig City, Metro Manila, Philippines. .
13. Theary, C., et al., *Fish sauce, soy sauce, and vegetable oil fortification in Cambodia: where do we stand to date?* Food Nutr Bull, 2013. **34**(2 Suppl): p. S62-71.
14. Whitfield, K.C., et al., *Household Consumption of Thiamin-Fortified Fish Sauce Increases Erythrocyte Thiamin Concentrations among Rural Cambodian Women and Their Children Younger Than 5 Years of Age: A Randomized Controlled Efficacy Trial*. Journal of Pediatrics, 2017. **181**: p. 242-247.e2.
15. Yu, L., et al., *Secular trends in salt and soy sauce intake among Chinese adults, 1997–2011*. International Journal of Food Sciences and Nutrition, 2018. **69**(2): p. 215-222.
16. Yu, D., et al., *Salt intake among Chinese adults in 2010-2012*. Zhonghua yu fang yi xue za zhi [Chinese journal of preventive medicine], 2016. **50**(3): p. 217-220.



17. Zhai, F.Y., et al., *Study on the current status and trend of food consumption among Chinese population*. Zhonghua liu xing bing xue za zhi = Zhonghua liuxingbingxue zazhi, 2005. **26**(7): p. 485-488.
18. Zhu, Z., et al., *The dietary intake and its features across four seasons in the metropolis of China*. Journal of Nutritional Science and Vitaminology, 2019. **65**(1): p. 52-59.
